# Supplementary material
Source: HighWire-hosted journal article supplement (https://bmjophth.bmj.com/content/2/1/e000100)
Supplement: inline-supplementary-material-4 [file inline-supplementary-material-4.pdf]

# 為開角型青光眼患者 在病情決策上 作出輔助的小冊子

你是青光眼患者？何謂開角型青光眼？

感到迷惘，無助？有什麼治療選擇？

怎樣選擇合適自己的治療方案？

這本小冊子可以幫助你！

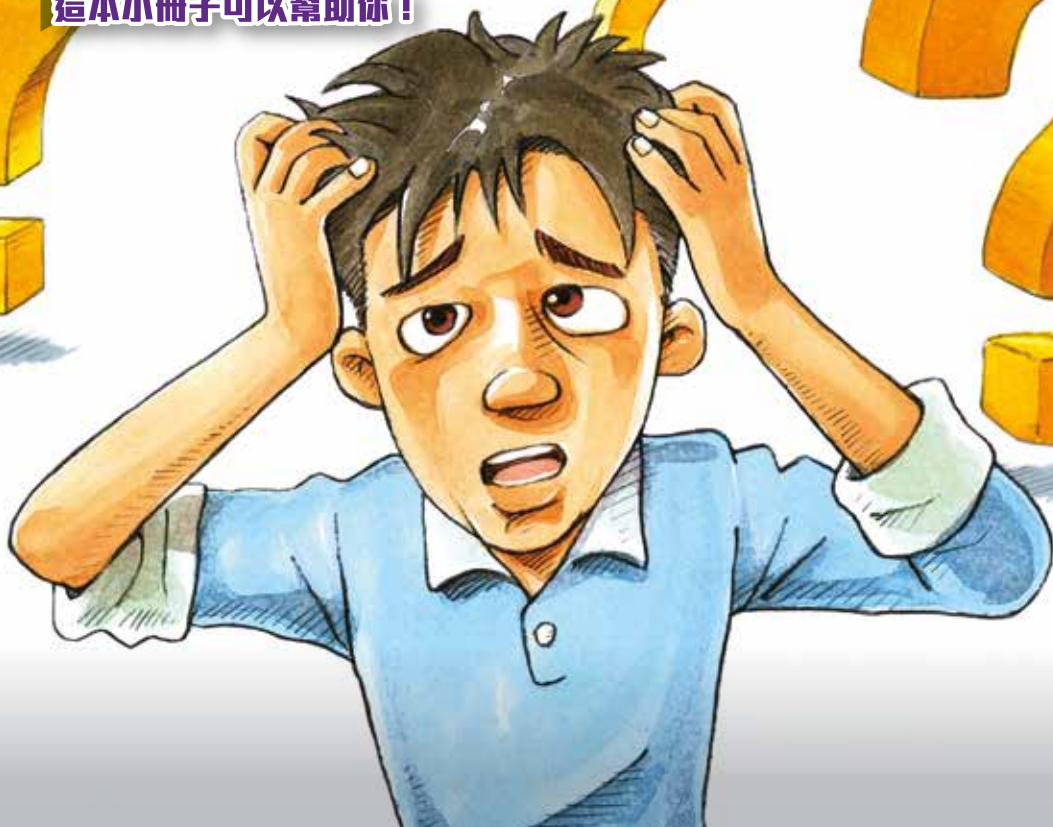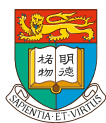

香港大學

## 1 原發性開角型青光眼知多點

## 2 藥物治療青光眼

## 3 激光治療青光眼

## 4 手術治療青光眼

## 5 治療方案一覽及大比拼

### 內容 撰寫

香港大學 / 瑪麗醫院

香港眼科醫院

何穎流 眼科專科醫生

陳培文 眼科專科醫生

蔡雅君 臨床助理教授，眼科專科醫生

黎心慧 眼科專科醫生

沈蔚瑄 臨床助理教授，眼科專科醫生

黃藹汶 眼科專科醫生

### 內容 審核

香港大學

康青會(香港青光眼病人互助織)

黎少明教授，眼科專科醫生

陳焯鴻臨床助理教授，眼科專科醫生

本小冊子獲香港大學知識交流撥款計劃資助。

#### 版權公告

本小冊子內的全部內容包括資料、相片、圖像等均歸香港大學所有。未經香港大學書面許可，任何人士均不得以任何方法或形式複製、出版、轉載、抄襲小冊子的內容用作商業或非法用途。

#### 免費聲明

本小冊子內的所有內容只能做一般資訊、參考用途，不可作為專業醫療建議、診斷或治療之用。如有任何關於健康問題、醫療狀況或護理之事宜，敬請諮詢專業的醫生或醫護人員，而不應倚賴本小冊子所提供的資訊。

香港大學盡力確保小冊子內容的準確及適時性，但不保證該等資料準確無誤，香港大學不對任何錯誤或疏漏承擔法律責任。對任何倚賴或使用本小冊子資料所導致的或涉及的任何損失、損害或賠償，香港大學概不承擔任何義務或法律責任。

# 開角型原發性 青光眼知多點

## 青光眼有多普遍？

青光眼非常普遍，在香港歷年來都是名列第二位的致盲眼疾，僅次於白內障。

每一百個四十歲以上的人口中，便有兩至三人受影響。每一百個失明個案中，便有八個與青光眼有關。

### 青光眼

本港40歲  
以上人口

每一百個四十歲以上的人口中，便有兩至三人受影響。

2%

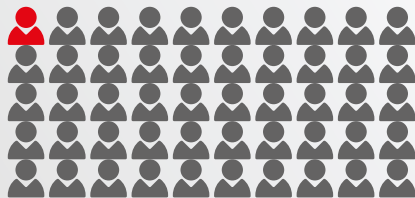

# 香港第2 致命殺手

## 的影響

本港失明  
個案

每一百個四十歲以上的人口中，便有兩至三人受影響。

4%

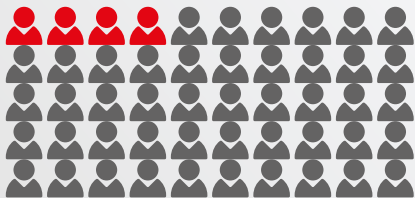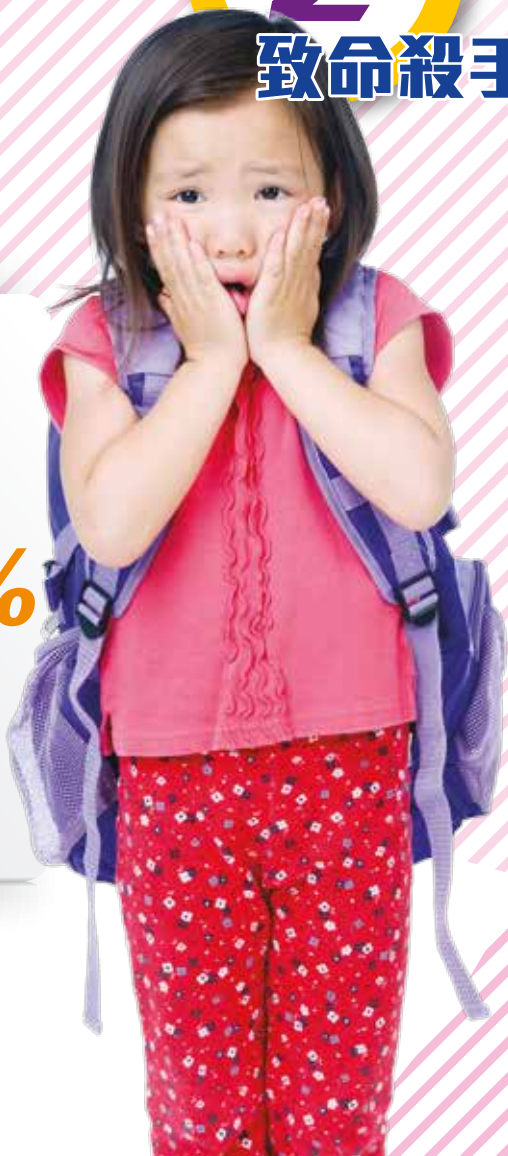

# 青光眼 vs 白內障

不同的是，大部份白內障病人經手術治療可以完全恢復視力，但青光眼造成的視力衰退卻大部份是永久性的，不可逆轉的。

晶體生病 → 可逆轉

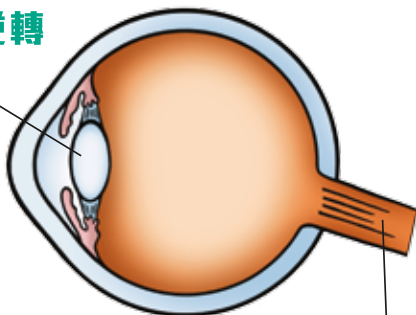

視神經生病 → 不可逆轉

## ◎ 甚麼是青光眼?

眼球的運作像相機，會把影象聚焦在視網膜上，再由視神經將影象傳送到大腦。

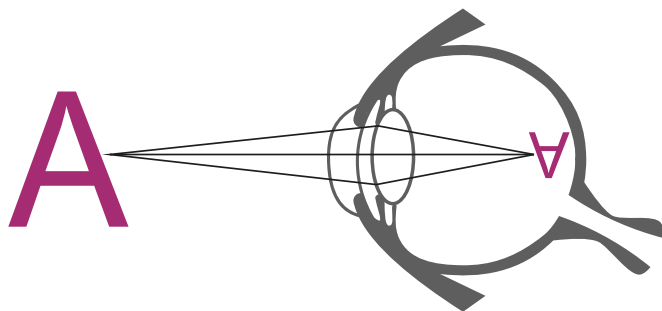

## 視覺神經

青光眼損害的，便是患者的視神經。隨著病情惡化，患者的視覺神經會逐漸萎縮，就像隧道不斷收窄一樣，傳遞到大腦的影像範圍便愈來愈小，最後導致失明。

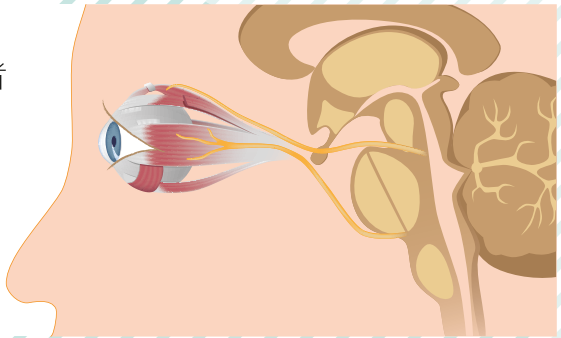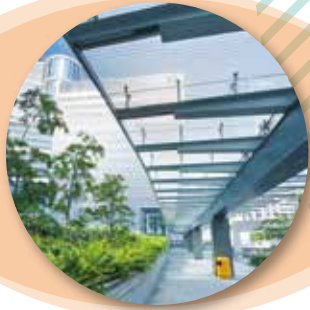

正常  
視野

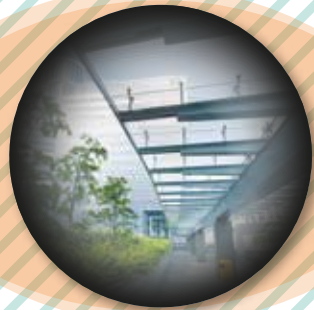

早期  
視野  
收

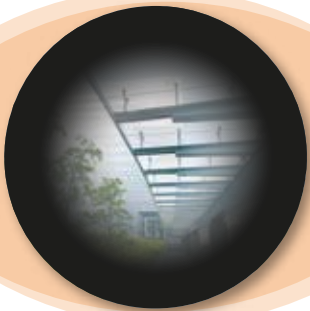

中期  
視野  
收

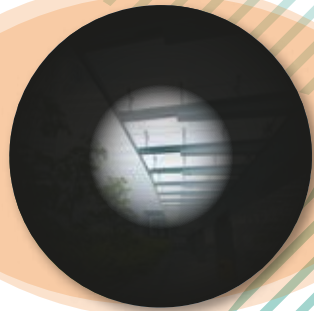

晚期  
視野  
收

# 視力小偷

不蒙  
不紅  
也不痛

哈哈

由於早期的青光眼只影響到周邊視野，而大部份的青光眼患者眼睛既不痛也不紅，如果不定期檢查，有機會到了晚期視野嚴重收窄時在警覺，因此青光眼又名「視力小偷」。

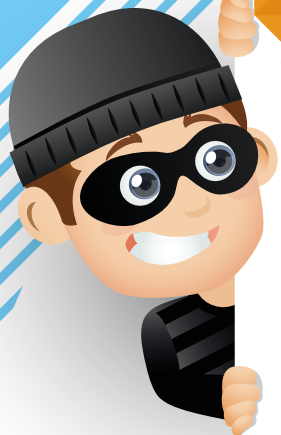

## 甚麼是原發性青光眼？

原發性青光眼乃指單純的青光眼，即並非由其他眼疾所導致。

相反，繼發性青光眼是由其他眼疾，例如由虹膜炎，眼睛創傷所引致。

## 甚麼是開角型青光眼？

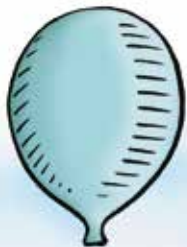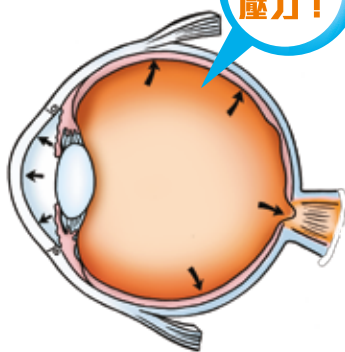

要解釋開角型青光眼不得不提眼壓。眼球像一個氣球，並有一個壓力指數。不同的是，氣球是「充氣」而眼球是「充液體」的。

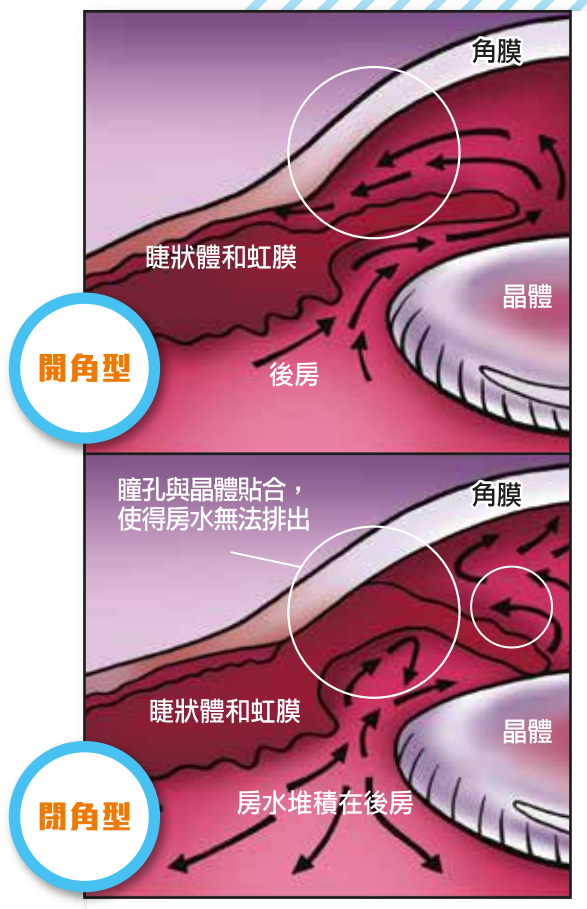

決定眼壓高低的是前房水，一種在眼內不斷流動的透明營養液體，最終會從前房角排走。如前房角開通，但排走房水的功能不良，便為之開角型。相反，如前房角閉塞，便為之閉角型了。

最常見的青光眼，便是原發性的開角型青光眼



# 青光眼的 療法

## 降低眼壓

在眾多導致青光眼的因素中，唯一證實並可控制的就只有眼壓。

一般人的眼壓界乎6至21mmHg。整體來說，降低眼壓可紓緩視神經的壓力，從而減慢青光眼的進展和傷害。可惜的是，原發性開角型青光眼一般病情發展緩慢，並可透過降低眼壓來控制病情，以防視力進一步受損。

眼壓  
要降低多少？  
才算好？

### 談談目標眼壓

眼壓跟血壓一樣，都有一個理想的控制水平，而且都不是降得越低越好。不一樣的地方是，理想的控制水平不是人人一樣。每一位青光眼患者的理想目標眼壓會因應患者的年紀，病情的嚴重程度，病情的進展速度以及其他因素而有所不同。醫生會先量度你的基礎眼壓（即在不受治療影響下，病人本身的眼壓），這是病人的「起跑線」。一般來說，理想目標眼壓是把你的眼壓從基礎上降低20－30%。下表為一些示範例子：

基礎眼壓  
(mmHg)

25

21

30

## 減低眼壓波動

我們的眼壓不像身高體重，它不是一直維持不變的。眼壓像血壓心跳，在24小時裏會有高低起伏。減低眼壓的波動對控制青光眼進展亦有幫助。

隨著醫學發展，青光眼的治療選擇亦愈來愈多，大致可分為用

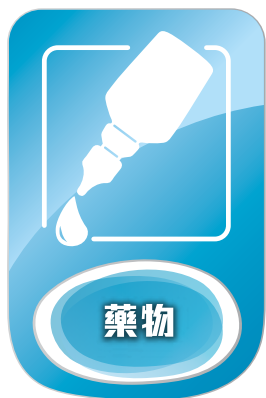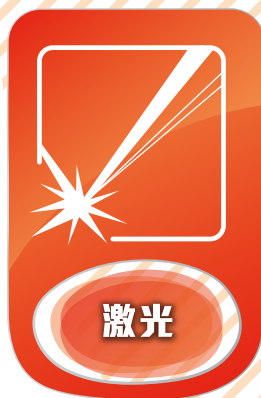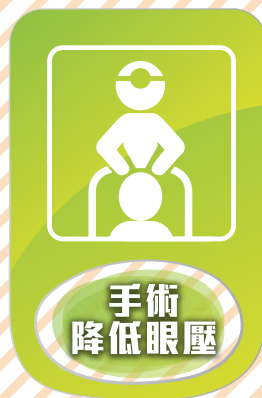

患者可因應自己的情況與醫生商量最適合的療法。

目標眼壓  
(mmHg)

18-20

15-17

21-24

## 藥物治療 青光眼

### 原理

藥物往往被視為青光眼的  
第一線治療，它們透過兩種  
主要方式降低眼內壓：

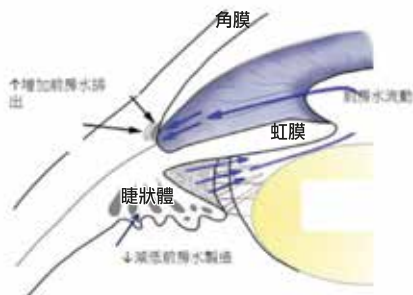

## 青光眼 眼藥水和 藥物

### 效果

#### 青光眼眼藥水

大概一半開角型青光眼病人用一種眼藥水可有效控制眼壓至目標水平，四分之一病人要用兩種眼藥水或以上。剩餘病人用眼藥水不能有效控制眼壓，或對藥水有過敏反應。

不過，根據經驗，藥水的效果隨時間會逐漸減少。有研究指出，成功用一種眼藥水控制眼壓的病人中，少於一半的人於五年後可維持原狀，剩餘的必須加藥水或轉用其他方法。

青光眼眼藥水亦有混合式的，把兩種類型的藥水配在同一個瓶子裡，方便病人使用。

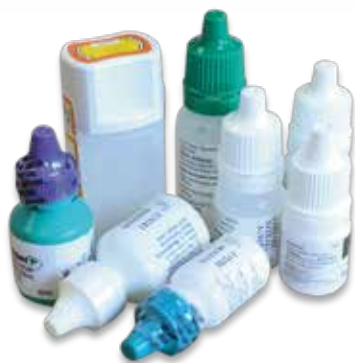

#### 口服型青光眼藥物(藥丸)

在特別情況下(例如病情控制不穩)，眼科醫生或許處方口服型青光眼藥物作為降低眼內壓的臨時措施。口服型青光眼藥物並不適合作長期服用，以免出現全身的併發症。

## 好處

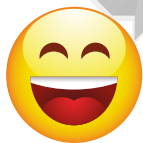

- 見效快
- 提供彈性選擇：可先試用藥水，如試後不適合，可選擇其他方案
- 副作用一般較輕微，嚴重損害視力的副作用近乎無
- 長遠而不可逆轉的副作用較少

## 弊端

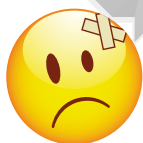

- 潛在副作用頗常見（見表一和表二）
- 用藥依不依從或不定時用藥的問題非常普遍，影響眼壓控制或波動
- 長期使用可對藥水產生過敏
- 長期使用藥水可影響或減低將來青光眼手術的成功率
- 藥水使用不便
- 每個病人對個別眼藥水反應不一，找適合自己的藥水可能需要一段時間
- 跟傳統手術比較，較少能把眼壓控制得很低

## 青光眼藥水潛在副作用

表一：

### 對眼睛潛在的副作用

- 當使用藥水時，眼睛周邊以及內部感到痛楚
- 感到灼熱或刺痛
- 紅眼症
- 痕癢
- 瞳孔大小出現變化
- 眼乾導致敏感，當燈光照射眼睛時會增加眼睛敏感程度
- 使用後喉嚨出現苦澀感覺
- 虹膜和眼皮的顏色加深，睫毛出現變化（增加長度、厚度，睫毛的顏色或數目會改變）

### 對全身潛在的副作用

- 頭痛
- 感覺疲倦
- 心率下降
- 血壓改變
- 令肺部病患惡化（例如哮喘、慢性阻塞性肺疾病）

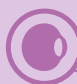

# 青光眼藥丸潛在副作用

表二：

## 普遍的副作用

- 手指或腳趾感覺刺痛或異常
- 感覺疲倦
- 食慾不振
- 尿頻
- 耳鳴

## 罕見的併發症

- 產生腎石
- 電解質紊亂
- 骨髓抑制
- 輕微敏感(例如紅疹)，甚至出現嚴重過敏性反應(假如病人病歷中出現對磺胺類藥物的敏感反應)

常見  
問題：

滴漏藥水

忘了  
滴藥水嗎？

嘿

嘿

嘿

青光眼病人非常容易滴漏藥水！反正藥水用不用視力都差不多，反而滴了藥水眼睛總是澀澀的。

要記住青光眼是一場長期抗爭！每次不依時用藥，眼壓便會升高，讓青光眼可一點一滴的偷走我們的視力。

把滴藥水融入生活習慣裏，例如和早午晚餐連在一起，並叫家人朋友幫忙提點。

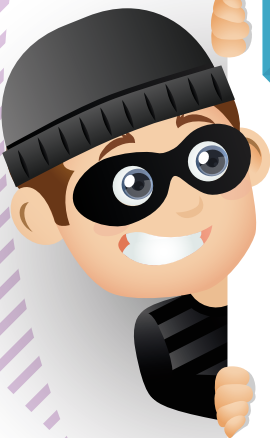

# 常見病人

顧慮

## 程序： 正確藥水用法

- ➔ 為了取得成效，你必須確保自己使用眼藥水的技巧能夠令眼藥水滴進眼睛內。
- ➔ 假如你需要使用多於一種眼藥水，你必需要確定每次滴眼藥水之間都要有適量時間吸收(至少有五分鐘以上)，否則，首次滴下的眼藥水未曾在眼睛得到適量吸收，就已經被第二次滴下的眼藥水沖走。
- ➔ 為取得最佳吸收效果，我們建議病人在使用眼藥水後閉目休息數分鐘，並且以手指頭在眼角施加些微壓力。
- ➔ 這些動作都有助減少眼藥水透過鼻淚管系統流走，亦同時減少眼藥水被身體吸收，從而降低出現副作用的風險。

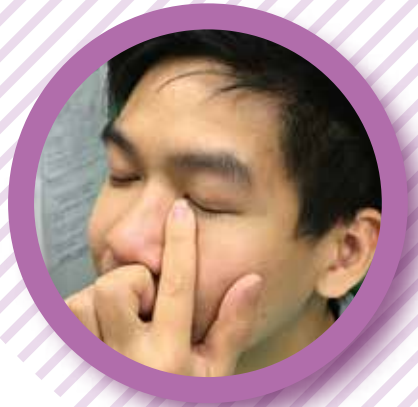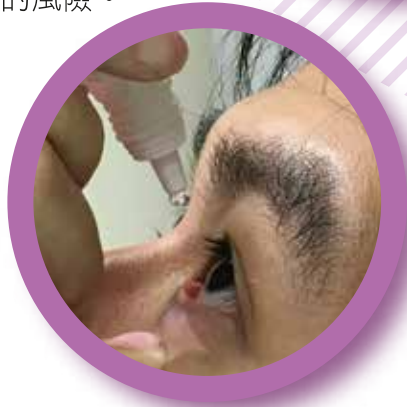

# 激光治療

隨着激光技術的日益發展，激光治療眼科疾病，特別是青光眼已日臻完善。

本文主要介紹最常用於開角型青光眼的激光治療：選擇性激光小樑網成形術(SLT, Selective laser trabeculoplasty)。

至於另一種青光眼激光治療 -- 睫狀體激光凝固術，一般是用在較末期或視力潛質較弱的病人，不在一般病人的選擇範圍內，故不在此詳談。用於閉角性青光眼的激光亦故不在此詳談。

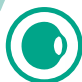

## 原理

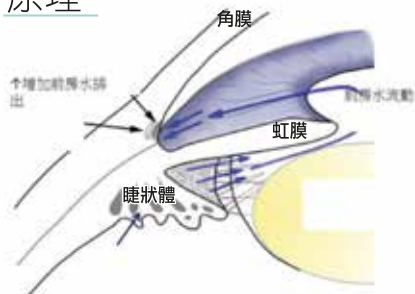

房水排出時，會流經不同的組織，而當中小樑網所造成的阻力最大。SLT選擇性地對小樑網產生作用，而鄰近的組織則不受損害，小樑網結構會重組，減低小樑網的阻力，增加前房水的排出量。

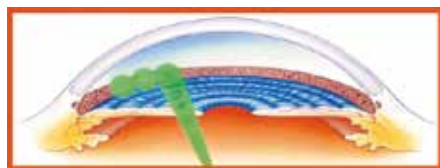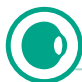

## 效果

- [ 10 red icons ] — 激光大概在70%病人發揮效力
- [ 1 blue icon, 1 red icon ] — 降眼壓幅度大概相等於用一至兩種青光眼眼藥水隨時間，降眼壓效用會減低。
- [ 10 red icons ] — 在激光一年後，大概60—90%病人能保持效果。
- [ 10 red icons ] — 在激光三年後，大概50—70%病人能保持效果。<sup>(5, 6)</sup>

## 好處

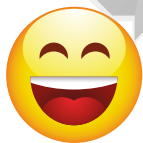

- 激光過程快捷、無痛、毋須住院
- 安全，副作用少而且大都輕微，嚴重影響視力的副作用近乎無
- 方便。用藥依從性或不定時問題不存在，整體眼壓控制較好，眼壓波幅較少
- 長遠來說，費用比起藥物相對低廉
- 當激光效果隨時間減低時，可重複再做激光

## 弊端

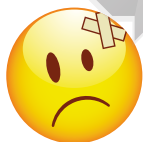

- 病人對激光的治療反應 效果不一，在一半病人身上無效。如果眼壓回升，有機會需要重複做激光或考慮其他治療方法
- 激光仍存在風險（見表三）
- 跟傳統手術比較，較少能把眼壓控制得很低

表三：

### SLT的副作用

- 眼壓短暫升高
- 前房發炎
- 眼睛發紅、不適

（副作用和不適大多在二十四小時內會減退）

## 常見病人

顧慮

### SLT程序：

- ➔ 可以在門診激光治療室完成
- ➔ 醫生會給你滴麻醉眼藥水
- ➔ 病人會坐在椅子上，激光機器前
- ➔ 醫生會把特製的接觸鏡放在眼睛上，病人會有知覺，但不會感痛楚
- ➔ 醫生會為病人進行激光
- ➔ 過程一般只需要10至15分鐘

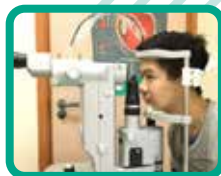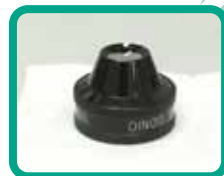



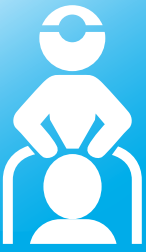

## 青光眼手術

### 原理

各種青光眼手術的原理其實大致雷同，就是製造一個新的通道，讓眼前房水可以通到眼球的其他地方，從而降低眼壓

各種手術不同之處，只是所製造的通道形式不同而已。青光眼手術大致可分為兩種：傳統引流手術或較新的微創青光眼手術。

傳統引流手術常見包括小樑切除術 和人工導管引流手術等。

這些手術的性質、功效、好處和壞處都類近，醫生會根據病人的情況，建議適合的手術方法。

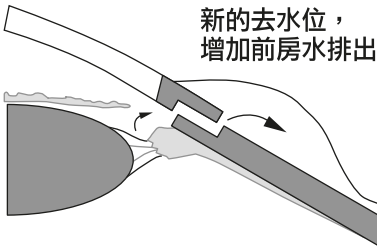

程序

效果

好處

弊端

表四：

### 傳統引流手術的併發症

#### 較常見及輕微

- 眼壓過高或過低，需術後再調節
- 傷口滲漏
- 發炎
- 增加患白內障風險

#### 較罕見及嚴重

- 嚴重感染、眼內炎
- 嚴重出血（脈絡上腔出血）、脈絡膜剝離
- 低壓性黃斑病變

注：人工導管引流手術另可有以下併發症

- 重影、角膜水腫
- 導管外露移位

## 小樑切除術

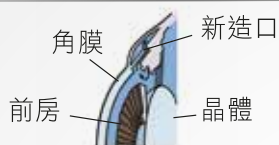

注：近年有一種Express導管，可以用於小樑切除術中，成功率相約，可令手術效果更一致，在某些特別的情況下可能更有優勢，但手術費用會因此增加

## 人工導管引流手術

和小樑切除術一樣，將房水引流至結膜下腔但人造窗口則以膠導管代替

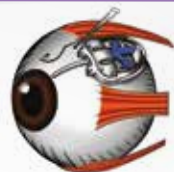

在藥物、激光和各種青光眼手術中，傳統引流手術降眼壓的效果最顯著，一般能把眼壓降至10或甚至以下。注意眼壓不一定越低越好，醫生會視乎病人情況，在術後用各種方法把眼壓調節到接近目標眼壓。

- 降眼壓的效果較顯著
- 傳統手術治療，較多學術文獻支持
- 用藥依從性或不定時問題不存在，整體眼壓控制較好，眼壓波幅較少
- 手術後復原時間較長，視力及眼壓在術後可能出現波動
- 術後護理較繁複，有可能需要用激光拆線、結膜下注射特效藥、重做手術等以令效果穩定
- 併發症較常見，有致盲的風險（見表四）
- 手術效果可能隨時間減弱，甚至失效

## 微創青光眼引流手術

### 原理

在對眼睛組織影響最小的情況下將房水引流達致減低眼壓的效果

### 程序

有很多不同的手術方法，有些手術經前房把裝置植入小樑，或把一部分小樑切除以達到引流的效果，另外有些引流裝置則經眼球外的結膜植入

### 效果

- 降眼壓效果較傳統手術少

### 好處

- 較安全，併發症相對較少

### 弊端

- 眼壓下降幅度較小樑切除術少
- 嚴重手術風險較傳統手術少，但存在
- 技術較新，長遠成功率不詳

|              | 藥物治療 (眼藥水)                                                                                                                                                                                                                                                            | 激光治療 (SLT)                                                                                                                                                                                                                                                                 |
|--------------|-----------------------------------------------------------------------------------------------------------------------------------------------------------------------------------------------------------------------------------------------------------------------|----------------------------------------------------------------------------------------------------------------------------------------------------------------------------------------------------------------------------------------------------------------------------|
| <b>降眼壓效果</b> | <ul style="list-style-type: none"> <li>· 效果不俗但因人而異</li> <li>· 可調節藥水的種類 (最多可用三至四種)</li> </ul>                                                                                         | <ul style="list-style-type: none"> <li>· 效果不俗但因人而異 (大概一半人有效，一半無效)</li> <li>· 效果大致相等於一至兩種藥水</li> </ul>                                                                                     |
| <b>過程</b>    | <p>需每天按時用藥</p>                                                                                                                                                                                                                                                        | <ul style="list-style-type: none"> <li>· 激光過程大概10-15分鐘</li> <li>· 復原期非常快</li> <li>· 有機會減少對藥水的依賴，減少麻煩</li> <li>· 可在門診進行，較方便</li> </ul>                                                                                                                                      |
| <b>好處</b>    | <ul style="list-style-type: none"> <li>· 見效快</li> <li>· 提供彈性選擇</li> <li>· 副作用一般較輕微，嚴重損害視力的副作用近乎無</li> <li>· 長遠而不可逆轉的副作用較少</li> </ul>                                                 | <ul style="list-style-type: none"> <li>· 過程快捷、無痛、毋須住院</li> <li>· 安全，副作用少而且大都輕微，嚴重影響視力的副作用近乎無</li> <li>· 方便，減少對藥水的依賴整體眼壓控制較好，眼壓波幅較少</li> <li>· 費用比起藥物相對低廉</li> <li>· 可重複再做激光</li> </ul>  |
| <b>弊端</b>    | <ul style="list-style-type: none"> <li>· 潛在副作用頗常見(見表一和表二)</li> <li>· 用藥依從性或不定時問題常見，影響眼壓控制或波幅</li> <li>· 長期使用可對藥水產生過敏</li> <li>· 長期使用藥水可影響或減低將來青光眼手術的成功率<sup>(3, 4)</sup></li> <li>· 藥水使用不便</li> <li>· 每個病人對個別眼藥水反應不一，試藥水需時間</li> <li>· 跟傳統手術比較，較少能把眼壓控制得很低</li> </ul> | <ul style="list-style-type: none"> <li>· 在一半病人身上無效</li> <li>· 降眼壓不是即時生效，生效大概需4至6個星期</li> <li>· 激光仍存在風險 (見表三)</li> <li>· 跟傳統手術比較，較少能把眼壓控制得很低</li> </ul>                                                                                                                     |

# 覽及大比拼

| 青光眼手術 (傳統)                                                                                                                                                                                                  | 青光眼手術 (微創)                                                                                                                                    |
|-------------------------------------------------------------------------------------------------------------------------------------------------------------------------------------------------------------|-----------------------------------------------------------------------------------------------------------------------------------------------|
| <ul style="list-style-type: none"> <li>效果最顯著，眼壓降得最低</li> </ul>                                                              | <ul style="list-style-type: none"> <li>效果不俗但因人而異</li> </ul>  |
| <ul style="list-style-type: none"> <li>手術大概半至一小時</li> <li>復原需時較長</li> <li>較大機會減少對藥水的依賴，減少麻煩</li> <li>必須在手術室進行</li> </ul>                                                                                    | <ul style="list-style-type: none"> <li>大概半至一小時</li> <li>復原期快</li> <li>有機會減少對藥水的依賴，減少麻煩</li> <li>必須在手術室進行</li> </ul>                           |
| <ul style="list-style-type: none"> <li>降眼壓的效果較顯著</li> <li>方便，減少對藥水的依賴。整體眼壓控制較好，眼壓波動較少</li> <li>傳統手術治療，較多學術文獻支持</li> </ul>  | <ul style="list-style-type: none"> <li>較傳統手術安全，併發症相對較少</li> <li>方便，減少對藥水的依賴。整體眼壓控制較好，眼壓波動較少</li> </ul>                                        |
| <ul style="list-style-type: none"> <li>手術後復原時間較長，視力及眼壓在術後可能波幅</li> <li>術後護理較繁複，有可能需要用激光拆線、結膜下注射特效藥、重做手術等以令效果穩定</li> <li>併發症較常見，有致盲的風險(見表四)</li> </ul>                                                       | <ul style="list-style-type: none"> <li>眼壓下降幅度較小樑切除術少</li> <li>技術較新，長遠成功率不詳</li> <li>嚴重手術風險較傳統手術少，但存在</li> </ul>                               |

# 那一種方案 較適合我?

## 小測試!

(這有助初步分析你的情況，  
但這小測試不能取代或代表  
眼科醫生的專業意見)

安全性

藥水

成效

## 眼壓控制情況

1. 醫生說你的眼壓控制理想嗎?  
A) 好            B) 尚可            C) 不理想
2. 醫生說你的青光眼在加深嗎?  
A) 有            B) 沒有            C) 懷疑在加深
3. 醫生說你的青光眼嚴重嗎?  
A) 輕微            B) 中度            C) 嚴重

## 計分表

|   | A | B | C |
|---|---|---|---|
| 1 | 1 | 3 | 5 |
| 2 | 5 | 1 | 3 |
| 3 | 1 | 3 | 5 |

## 分析

### 眼壓控制需要嚴謹點嗎?

3-6

現時眼壓控制良好

7-11

現時眼壓控制常可，但須緊密覆診

12-15

現時眼壓控制偏差，需要嚴謹點

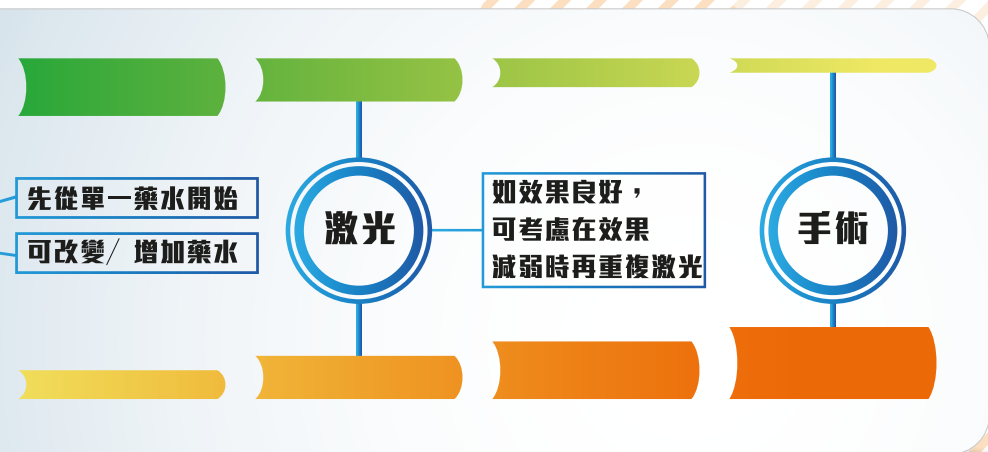

## 治療方案接受程度測試

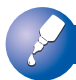

### 藥水

1. 你有準時每天用藥嗎？  
A) 非常乖和準時    B) 有時忘記    C) 經常忘記
2. 藥水有為你帶來不適或不便嗎？  
A) 沒有    B) 輕微    C) 頗多
3. 你有多接受藥水為你眼睛帶來的副作用（眼紅，乾澀等）？  
A) 接受    B) 輕微抗拒/抗拒    C) 非常抗拒
4. 長期使用眼藥水對將來手術的成功率有影響，這你能接受嗎？  
A) 接受    B) 輕微抗拒/抗拒    C) 非常抗拒

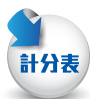

### 計分表

|   | A | B | C |
|---|---|---|---|
| 1 | 5 | 3 | 1 |
| 2 | 5 | 3 | 1 |
| 3 | 5 | 3 | 1 |
| 4 | 5 | 3 | 1 |

### 分析

#### 你對藥水的接受程度為...

4-11

你對藥水的接受程度頗低

12-20

你對藥水的接受程度良好

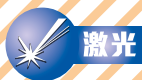

### 1. 進行激光治療會為你帶來不安嗎？

- A) 沒有                      B) 輕微                      C) 非常不安

### 2. 如進行了激光，但對你眼壓控制無效，你有多接受？

- A) 接受                      B) 輕微失望/失望                      C) 非常失望

### 3. 如激光成功，從而減低對眼藥水的依賴，這對您重要嗎？

- A) 不太重要                      B) 有點重要                      C) 非常重要

### 4. 如進行了激光，但眼壓控制隨時間失效需要重做，這你能接受嗎？

- A) 接受                      B) 輕微抗拒/抗拒                      C) 非常抗拒

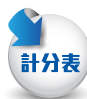

|   | A | B | C |
|---|---|---|---|
| 1 | 5 | 3 | 1 |
| 2 | 5 | 3 | 1 |
| 3 | 1 | 3 | 5 |
| 4 | 5 | 3 | 1 |

### 分析

#### 你對激光的接受程度為...

4-11

你對激光的接受程度頗低

12-20

你對激光的接受程度良好

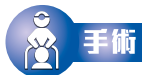

### 1. 進行手術會為你帶來不安嗎？

- A) 沒有                      B) 輕微                      C) 非常不安

### 2. 如手術成功把眼壓控制得非常理想，這對您重要嗎？

- A) 不太重要                      B) 有點重要                      C) 非常重要

### 3. 術後初期視力和眼壓會較波動，有機會需要額外小手術去調節眼壓，並且需要較頻密覆診，你有多接受？

- A) 絕不接受                      B) 尚可接受                      C) 接受

### 4. 手術始終附帶風險，有機會影響視力，感染，提早白內障，你有多接受？

- A) 接受                      B) 輕微抗拒/抗拒                      C) 非常抗拒

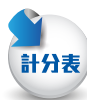

|   | A | B | C |
|---|---|---|---|
| 1 | 5 | 3 | 1 |
| 2 | 1 | 3 | 5 |
| 3 | 1 | 3 | 5 |
| 4 | 5 | 3 | 1 |

### 分析

#### 你對手術的接受程度為...

4-11

你對手術的接受程度頗低

12-20

你對手術的接受程度良好
